# Supplementary material
Source: PubMed Central journal article supplement (PMC6756928)
Supplement: NIHMS1534144-supplement-8.pdf [file NIHMS1534144-supplement-8.pdf]

**Suppl. Table 1. Genetic and clinical data of 2 families with SRNS and mutations in *KIRREL1***

| Family-Individual     | Nucleotide change | Amino acid change | Zygoty | Exon | PPH2  | SIFT | MT | Amino acid conserved to species | gnomAD hom/het/all (allele frequency in %) | EVS hom/het/all (allele frequency in %) | Sex | Ethnic origin | PC | Age of onset at (yrs) | Extra renal manifestations | Biopsy (age) | Renal phenotype | Renal function | Therapy and response (Y/N)                              | Follow up (yrs) |
|-----------------------|-------------------|-------------------|--------|------|-------|------|----|---------------------------------|--------------------------------------------|-----------------------------------------|-----|---------------|----|-----------------------|----------------------------|--------------|-----------------|----------------|---------------------------------------------------------|-----------------|
| <b><u>KIRREL1</u></b> |                   |                   |        |      |       |      |    |                                 |                                            |                                         |     |               |    |                       |                            |              |                 |                |                                                         |                 |
| A666-21 <sup>^</sup>  | c.1318C>T         | p.Arg440Cys       | Hom    | 11   | 0.999 | Del  | DC | <i>D. rerio</i>                 | 0/1/251320 (0.0003979)                     | not reported                            | M   | Arabic        | Y  | 5                     | None                       | MCD (5)      | SRNS            | normal         | CS (N)<br>CP (N)<br>CsA (N)<br>MMF (N)<br>ACE-I and ARB | 12,5            |
| B742-21               | c.1718C>T         | p.Ser573Leu       | Hom    | 13   | 0.825 | Del  | DC | <i>D. rerio</i>                 | 1/220/282054 (0.078)                       | 0/12/6491 (0.0923)                      | M   | Italian       | Y  | 14                    | None                       | FSGS (14)    | SRNS            | CKD Stage 2    | CS (N)<br>Tac (partially Y)<br>ACE-I and CCB            | 4               |

The following NCBI GenBank annotations were used: *KIRREL1* (NM\_018240.6). <sup>^</sup>Younger sister had similar clinical phenotype, but no DNA sample could be obtained.

ACE-I, angiotensin-converting enzyme inhibitor; ARB, angiotensin II receptor blocker; CCB, calcium channel blocker; CKD, chronic kidney disease (eGFR calculated using CKD-EPI equation); CP, cyclophosphamide; CS, corticosteroid; CsA, cyclosporine A; DC, disease causing; Del, deleterious; *D. rerio*, *Danio rerio*; EVS, Exome Variant Server; FSGS, focal segmental glomerulosclerosis; gnomAD, Genome Aggregation Database (<http://gnomad.broadinstitute.org>); Hom, homozygous; M, male; MCD, minimal change disease; MMF, mycophenolate mofetil; MT, Mutation Taster (prediction software); N, no; PC, parental consanguinity; PPH2, PolyPhen-2 (prediction software); SIFT, Sorting Intolerant From Tolerant (prediction software); SRNS, steroid-resistant nephrotic syndrome; Tac, tacrolimus; Y, yes; yrs, years.
